# Supplementary material for: Long-term treatment of Cushing’s disease with pasireotide: 5-year results from an open-label extension study of a Phase III trial
Source: Springer Nature journal article supplement (doi:10.1007/s12020-017-1316-3), 2017-06-09
Supplement: MOESM1 [file 12351222]

**Long-term treatment of Cushing's disease with pasireotide:  
5-year results from an open-label extension study of a Phase III trial**

S Petersenn, LR Salgado, J Schopohl, L Portocarrero-Ortiz, G Arnaldi, A Lacroix,  
C Scaroni, S Ravichandran, A Kandra, and BMK Biller

**Supplementary appendix**

**Assay details**

UFC values were determined by high-performance liquid chromatography (Alliance<sup>®</sup> 2795 High Throughput System, Waters Corp, Milford, MA, USA; normal UFC range: 30–145 nmol/24h [10.8–52.5 µg/24h]). All samples were analysed by central laboratories (Eurofins Medinet BV, Breda, The Netherlands; CRL Medinet Inc, Lenexa, KS, USA; and Eurofins Technology Services [Suzhou] Co Ltd, Suzhou, China). Blood samples were tested for serum cortisol (assay: ADVIA Centaur<sup>®</sup> CP Immunoassay System, Siemens Healthcare Diagnostics Inc, Tarrytown, NY, USA) and plasma ACTH (assay: Immulite<sup>®</sup> 2000 ACTH kit, DPC, Los Angeles, CA, USA). Saliva samples were tested for salivary cortisol (assay: cortisol ELISA RE52611, IBL-Hamburg GmbH, Germany).

**Supplementary Fig. 1** Reasons for patient discontinuation by treatment year

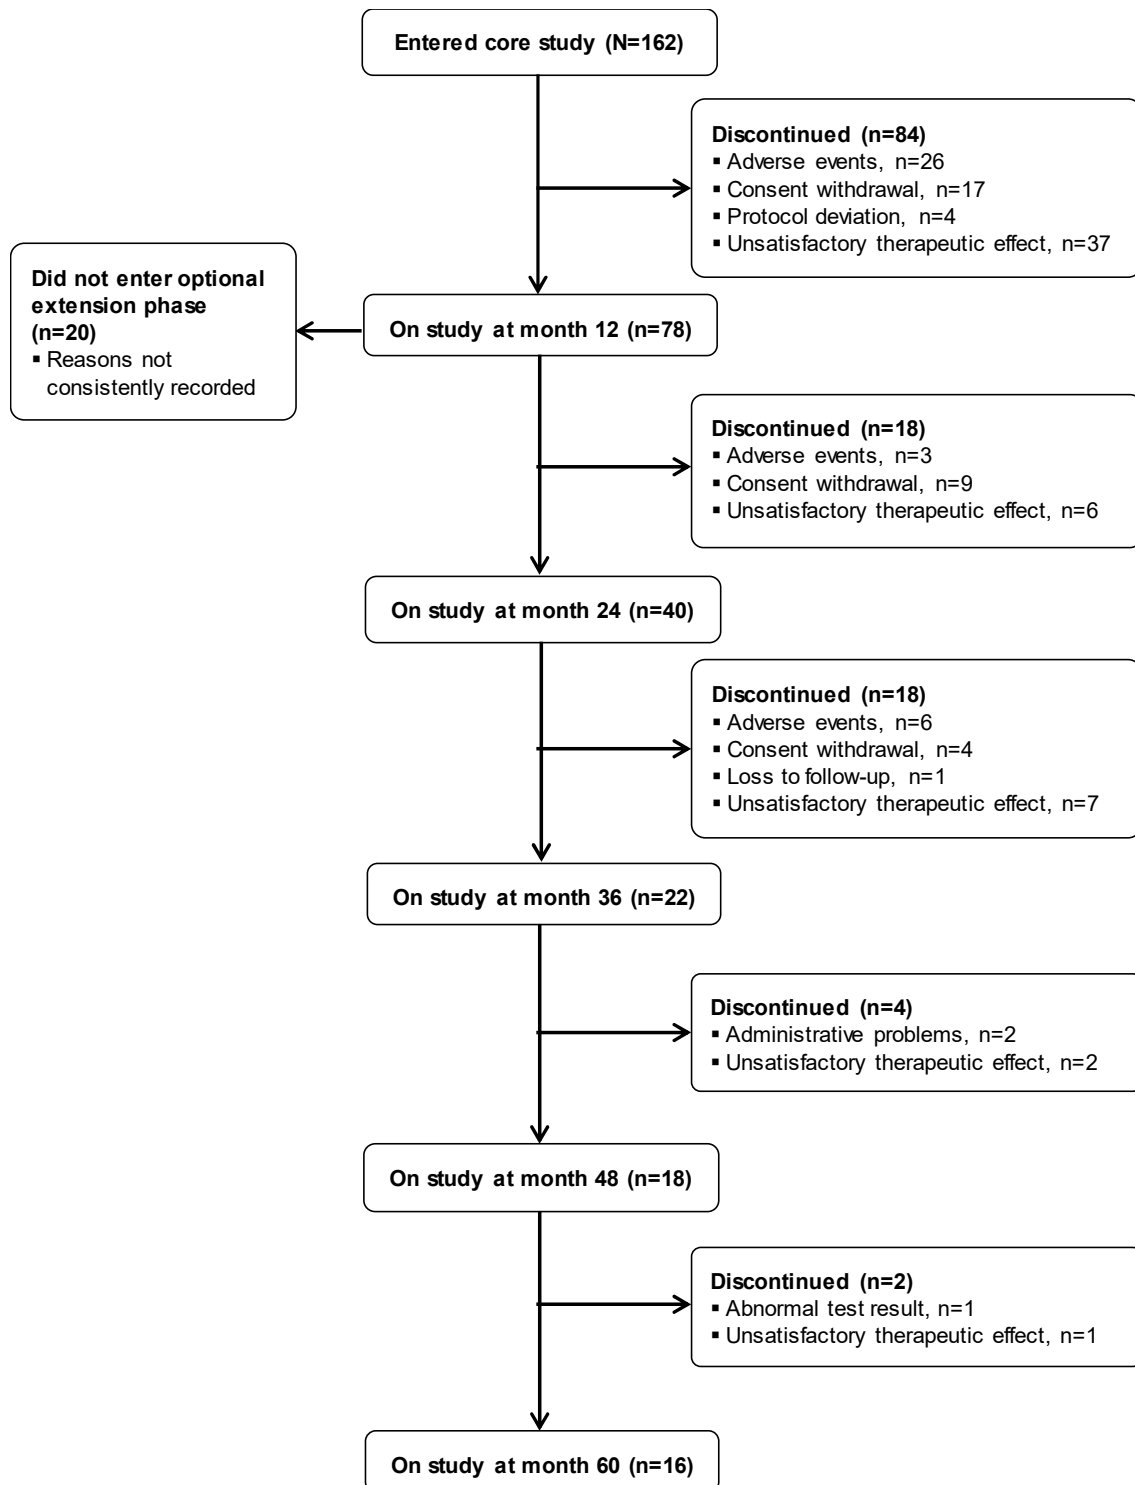

**Supplementary Fig. 2** UFC levels from baseline up to month 60 in patients who were (a) uncontrolled at month 12 but controlled at month 60 (n=2) and (b) controlled at month 12 but partially controlled at month 60 (n=2)

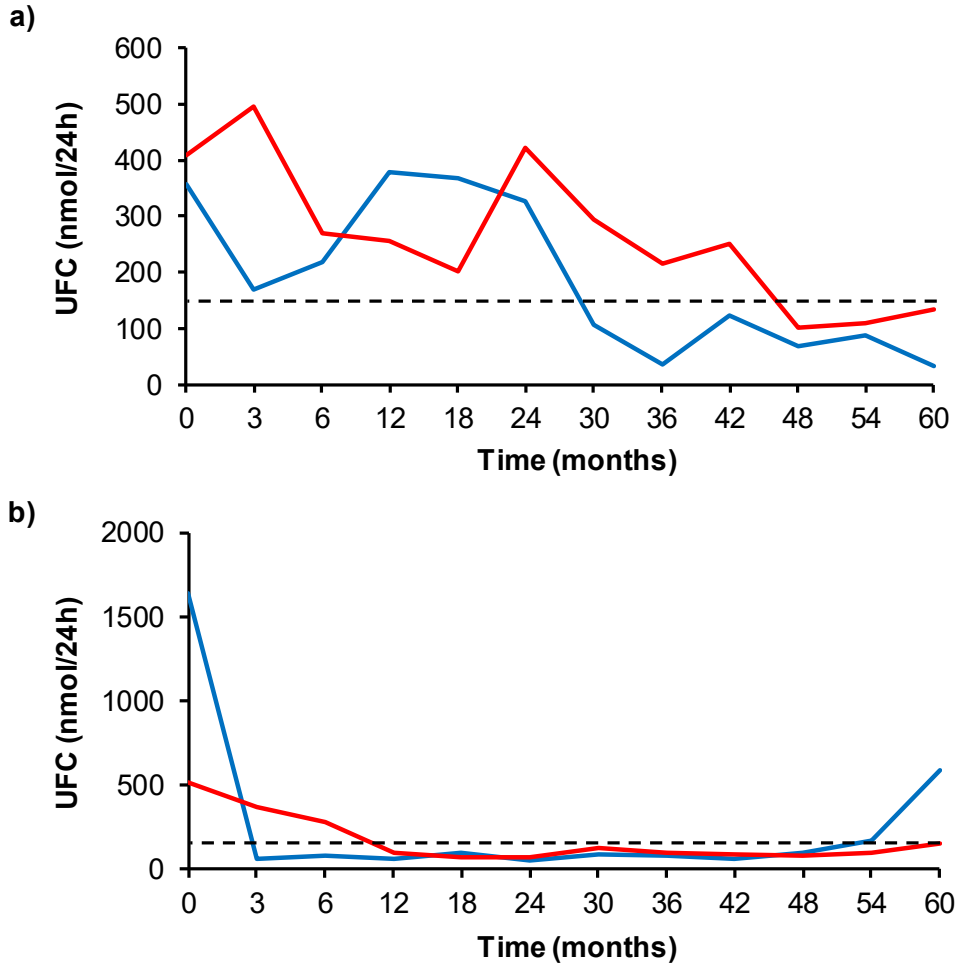

Dashed line represents ULN for UFC (145 nmol/24h). Data represent actual UFC values from baseline to month 60 for individual patients

**Supplementary Fig. 3** Proportion of patients with a shift in signs of Cushing's disease at month 60 from baseline

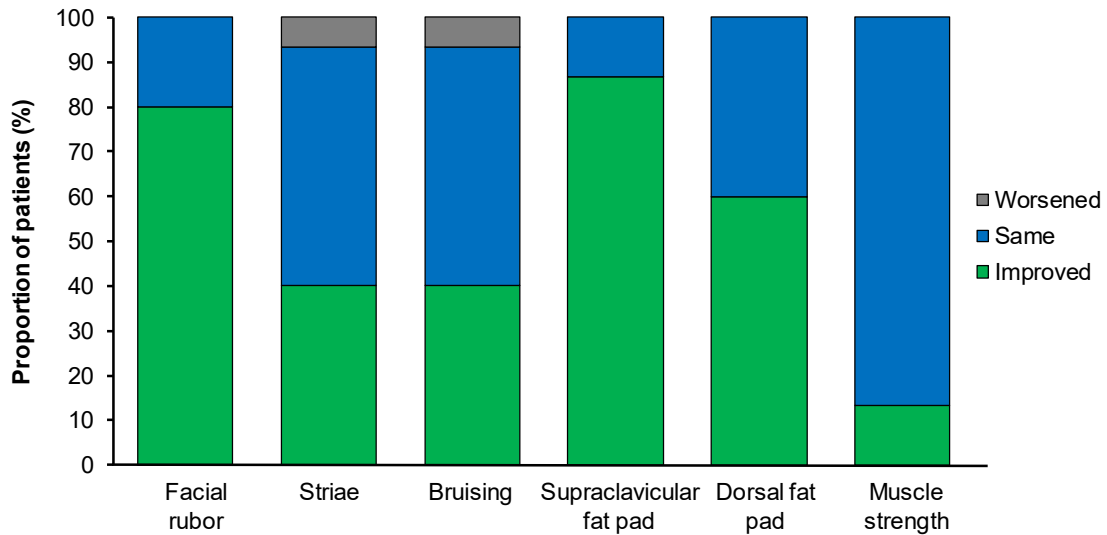

Facial rubor, striae, bruising and fat pads were assessed by a blinded reviewer using photographs (0=no signs, 1=mild, 2=moderate, 3=severe). Muscle strength was assessed according to the patient's ability to stand from a low seated position with arms extended (0=able to stand easily with arms extended, 1=able to stand after several efforts without using arms as assistance, 2=able to stand by using arms as assistance, 3=completely unable to stand). Fifteen patients had evaluable measurements at both month 60 and baseline

**Supplementary Table 1** Changes in pituitary tumour volume in patients with evaluable measurements at baseline

| <b>Patient</b> | <b>Baseline,<br/>cm<sup>3</sup></b> | <b>Last available<br/>assessment, cm<sup>3</sup></b> | <b>Change to last post-<br/>baseline assessment, cm<sup>3</sup></b> |
|----------------|-------------------------------------|------------------------------------------------------|---------------------------------------------------------------------|
| 1              | 0.20                                | 0.03                                                 | -0.16                                                               |
| 2              | 0.17                                | 0.03                                                 | -0.14                                                               |
| 3              | 0.10                                | 0.36                                                 | +0.26                                                               |
| 4              | 0.06                                | 0.10                                                 | +0.04                                                               |
| 5              | 0.04                                | 0.09                                                 | +0.05                                                               |
| 6              | 0.02                                | 0.00                                                 | -0.02                                                               |

**Supplementary Table 2** CTCAE grade of AEs related to hyperglycaemia, the gallbladder/biliary tract, the liver, or bradycardia at first occurrence and worst value at any time after first occurrence (overall population)

| First reported<br>AE grade                   |            | AE reported<br>once | Worst reported AE grade after first occurrence |           |           |          |
|----------------------------------------------|------------|---------------------|------------------------------------------------|-----------|-----------|----------|
|                                              |            |                     | Grade 1                                        | Grade 2   | Grade 3   | Grade 4  |
| n                                            | n (%)      | n (%)               | n (%)                                          | n (%)     | n (%)     | n (%)    |
| <b>Bradycardia related</b>                   |            |                     |                                                |           |           |          |
| Grade 1                                      | 19         | 14 (73.7)           | 4 (21.1)                                       | 0         | 1 (5.3)   | 0        |
| Grade 2                                      | 5          | 2 (40.0)            | 2 (40.0)                                       | 0         | 1 (20.0)  | 0        |
| Grade 3                                      | 1          | 1 (100.0)           | 0                                              | 0         | 0         | 0        |
| Grade 4                                      | 0          | 0                   | 0                                              | 0         | 0         | 0        |
| <i>Total</i>                                 | <i>25</i>  | <i>17</i>           | <i>6</i>                                       | <i>0</i>  | <i>2</i>  | <i>0</i> |
| <b>Gallbladder and biliary tract related</b> |            |                     |                                                |           |           |          |
| Grade 1                                      | 48         | 31 (64.6)           | 10 (20.8)                                      | 2 (4.2)   | 3 (6.3)   | 2 (4.2)  |
| Grade 2                                      | 12         | 5 (41.7)            | 3 (25.0)                                       | 3 (25.0)  | 1 (8.3)   | 0        |
| Grade 3                                      | 1          | 1 (100.0)           | 0                                              | 0         | 0         | 0        |
| Grade 4                                      | 0          | 0                   | 0                                              | 0         | 0         | 0        |
| <i>Total</i>                                 | <i>61</i>  | <i>37</i>           | <i>13</i>                                      | <i>5</i>  | <i>4</i>  | <i>2</i> |
| <b>Hyperglycaemia related</b>                |            |                     |                                                |           |           |          |
| Grade 1                                      | 56         | 20 (35.7)           | 12 (21.4)                                      | 15 (26.8) | 9 (16.1)  | 0        |
| Grade 2                                      | 44         | 20 (45.5)           | 5 (11.4)                                       | 8 (18.2)  | 11 (25.0) | 0        |
| Grade 3                                      | 20         | 8 (40.0)            | 1 (5.0)                                        | 7 (35.0)  | 4 (20.0)  | 0        |
| Grade 4                                      | 2          | 0                   | 0                                              | 1 (50.0)  | 1 (50.0)  | 0        |
| <i>Total</i>                                 | <i>122</i> | <i>48</i>           | <i>18</i>                                      | <i>31</i> | <i>25</i> | <i>0</i> |
| <b>Liver safety related</b>                  |            |                     |                                                |           |           |          |
| Grade 1                                      | 15         | 7 (46.7)            | 7 (46.7)                                       | 1 (6.7)   | 0         | 0        |
| Grade 2                                      | 9          | 2 (22.2)            | 1 (11.1)                                       | 3 (33.3)  | 3 (33.3)  | 0        |
| Grade 3                                      | 4          | 1 (25.0)            | 1 (25.0)                                       | 0         | 2 (50.0)  | 0        |
| Grade 4                                      | 0          | 0                   | 0                                              | 0         | 0         | 0        |

|              |    |    |   |   |   |   |
|--------------|----|----|---|---|---|---|
| <i>Total</i> | 28 | 10 | 9 | 4 | 5 | 0 |
|--------------|----|----|---|---|---|---|

---

Two bradycardia-, four gallbladder/biliary-, 20 hyperglycaemia-, and three liver-related AEs worsened to CTCAE grade 3 after the first event; two gallbladder/biliary-related AEs worsened to CTCAE grade 4 (Table 3). Worst reported CTCAE grades after first occurrence were lower than at the first reported event in a number of patients (bradycardia, n=2; gallbladder/biliary tract, n=3; hyperglycaemia, n=15; liver safety, n=2)
